# Supplementary material
Source: Springer Nature journal article supplement (https://www.springermedizin.de/resource/supplementary/12985_2010_1382_MOESM1_ESM.pdf/9609704)
Supplement: MOESM1 [file 9609704]

|                 |                                          |                                             |                                              |
|-----------------|------------------------------------------|---------------------------------------------|----------------------------------------------|
| O-85/34         | LVSEDFERQMAYYATTWTSKDILEVLAMMPGNRAQKELIQ | GKLN <del>EE</del> AERWVRQNP <del>PGP</del> | N -- VLTVDQIMGVGQTNQQASQANMDQARQICLQWVITALRS |
| O-1514          | -----L-----                              | -----                                       | -----                                        |
| <b>O-16A27</b>  | -----L-----                              | -----                                       | -----                                        |
| <b>O-23F18</b>  | -----L-----                              | -----                                       | -----                                        |
| <b>O-23117</b>  | -----                                    | -----                                       | -----S-----                                  |
| C-CAEV-Co       | -----L-----                              | -----R-N--P-                                | A <b>GG</b> G-----A-A-----N--A               |
| <b>C-Bonnie</b> | -----L-----L-                            | -----R-N--P-                                | A <b>GG</b> G-----V-A-----I-A                |
| <b>C-95</b>     | -----L-----                              | -----R-N--P-                                | A <b>GG</b> G-----A-A-----A                  |
| <b>C-FC2-44</b> | -----L-----                              | -----R-N--P-                                | A <b>GG</b> G-----A-A-----A                  |

**Epitope**                                  **GG**

|                 |            |                        |                                        |                      |          |
|-----------------|------------|------------------------|----------------------------------------|----------------------|----------|
| O-85/34         | VRHMSHRPGN | PMLVKQKNTESYEDFIARLLEA | IDAEPVTDPIKTYLKVTLSYTNASADCQKQMDRVLGTR | VQQATVEEKMQACRDVGSEG | FKMQLLAQ |
| O-MV 1514       | -----      | -----                  | -----T-----T-----                      | -----                | -----    |
| <b>O-16A27</b>  | -----      | -----                  | -----T-----                            | -----                | -----    |
| <b>O-23F18</b>  | -----      | -----                  | -----T-----                            | -----                | -----    |
| <b>O-23117</b>  | -----      | -----N---E-V-----      | -----T-----                            | -----                | -----    |
| C-CAEV-Co       | ---A---    | -----TN-P---A-----     | -----Q--D--L-----T--Q-                 | ---S---              | -----    |
| <b>C-Bonnie</b> | ---A-K---  | -----TN---A-----       | -----Q--E--L-----S-----Q-              | ---S---              | Y-I----- |
| <b>C-95</b>     | ---K---    | --VIR--TN---A-----     | -----QA-E--L-----S-----Q-              | ---S---              | -----    |
| <b>C-FC2-44</b> | ---K---    | --VIR--TN---A-----     | -----QA-E--L-----S-----Q-              | ---S---              | -----    |

**MHR**                                  **Epitope**
